# Supplementary material for: Mitochondrial Dysfunction: a Notable Contributor to the Progression of Alzheimer’s & Parkinson’s Disease
Source: Preprints.org preprint supplement (doi:10.20944/preprints202109.0073.v1), 2021-09-03
Supplement: Supplementary file 1 [file supplementary]

**Copyright**

This article contains information from an open access journal and does not need copyright agreement form.
